# Supplementary material for: Water release and homogenization by dynamic recrystallization of quartz
Source: Copernicus journal article supplement (doi:10.5194/egusphere-2022-1487), 2023-01-02
Supplement: Supplementary file [file egusphere-2022-1487-AC1-supplement.pdf]

Referee's comments: Black (Arial)

Our replies: Blue (Arial)

Revisions made to the manuscript in response to the referees' comments: Red (Times New Roman).

Descriptions from the original manuscript: Black (Times New Roman)

### ***Replies to Referee #1's comments***

These comments are intended for the editor and authors.

In this short paper, Fukuda et al. compare the water content of quartz in three granitic samples using infrared spectroscopy. Water has a major affect on the rheology of quartz, but the details of this are complicated and not well understood. The paper is fairly clearly written, the figures are of excellent quality, and I enjoyed reading the paper and learned some things. I must point out here that while I am familiar with recrystallization of quartz, I have not studied water contents in quartz and the reader of this review should keep that in mind while considering my comments.

My main concern about the paper is the small sample size (N=3) and use of only one technique to investigate the samples. As far as I know, IR measurements are not particularly expensive or laborious to make, although IR mapping may be relatively novel (I'm not sure). So my sense is that the study is well below the average published contribution in terms of the intellectual rigor involved in its production. Also, other studies have already shown similar results—the authors cite two previous studies (Finch et al., 2016; and Kronenberg et al., 2020) showing decreased water concentration associated with recrystallization in natural samples. Adding another data set like this to the literature is valuable, however I am accustomed in published work to see significantly more data presented and/or a more detailed analysis that makes more progress towards some outstanding question. There does not seem to any specific question being targeted or addressed by the study, other than “how does water content in this shear zone change during recrystallization?”.

IR point analyses of deformed quartz were performed in the 1990s during pioneering work by Prof. Kronenberg (Referee #3 of this manuscript). However, as IR spectroscopy is not commonly used and the IR mapping technique applied to water in deformed quartz is even rarer (Muto et al., 2004, 2005, Kronenberg et al., 2017; Fukuda and Shimizu, 2019), we still do not know much about water in natural quartz and its relationship to plastic deformation. With regard to these aspects, we need to know the following: 1. The water content of natural quartz; 2. whether water content changes as a result of textural development; and 3. whether water species change as a result of deformation. These questions should not be underestimated, as Prof. Kronenberg has commented in his review. Referee #1 states that our IR mapping measurements show only “water release by dynamic recrystallization”, similar to the results by point analyses by Finch et al. (2016) and Kronenberg et al. (2020). However, the water

contents are different from those determined in previous studies, as discussed in section 5.2. In addition, our “mapping” measurements, which were not performed in those previous studies, show “water content distributions in host grains and in neighboring recrystallized regions”. We also show the water-release process through intermediate water contents in regions of subgrains, which is also a new finding.

I recommend that additional samples are analyzed or some complimentary technique is added to the study before publication. For example, EBSD maps of the samples would allow a quantification of the degree of recrystallization and subgrain formation involved in changing water contents. Also, the authors infer the presence of subgrains in their thick sections, but this could be proven and quantified using EBSD. The authors also infer different types of recrystallization in strongly deformed and weakly deformed samples which I find puzzling—such differences could also be quantified using EBSD.

With regard to “additional samples are analyzed”, we originally performed IR mapping measurements on more than 20 areas of the three types of deformed rock, including different rock blocks and with the 100  $\mu\text{m}$  aperture to test and strengthen our findings. In the manuscript, we report data that have unambiguous information (such as from other minerals and cracks). Some additional data are shown below, but we emphasize that water contents were calculated using the JASCO software and applying Paterson’s (1982) simplified calibration (Fukuda and Shimizu 2019), which gave similar water contents to those calculated by applying Paterson’s (1982) original calibration. Raw IR spectra show no difference from those presented in the manuscript, so they have been omitted. The data shown immediately below are similar to those in the manuscript and would be redundant even as supplementary data. Therefore, we prefer to keep them in this response file, as readers can also see this file.

Almost undeformed sample  
Sample thickness: 95  $\mu\text{m}$

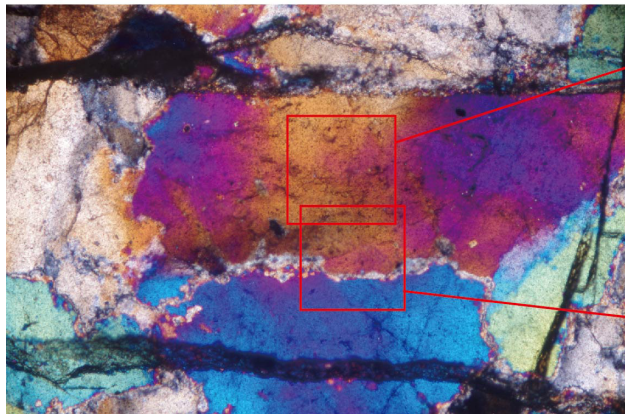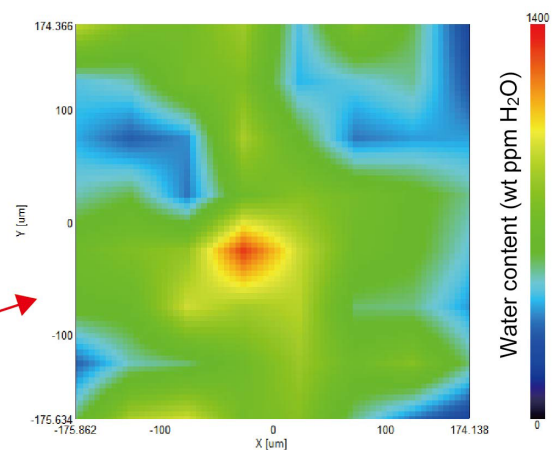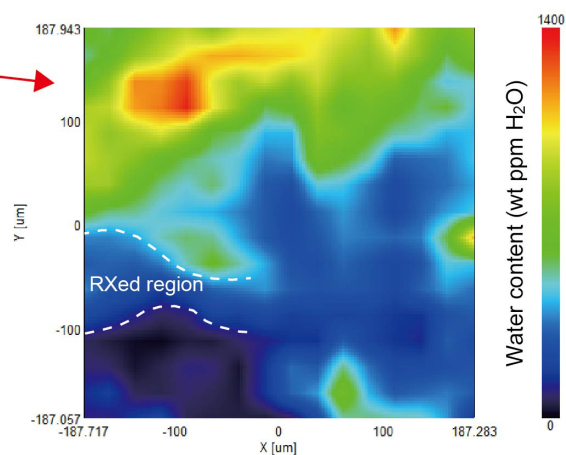

Weakly deformed sample  
Sample thickness: 97  $\mu\text{m}$

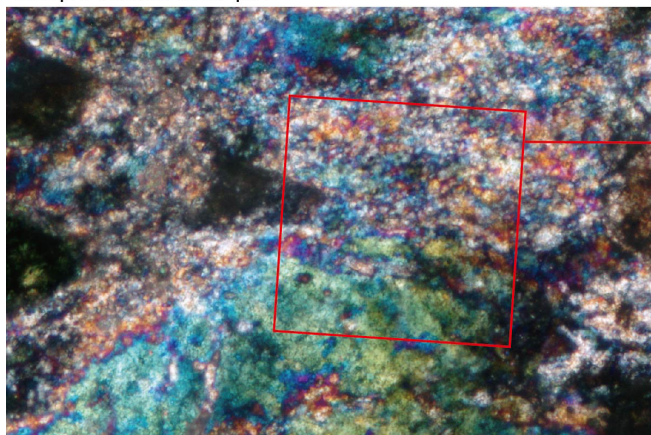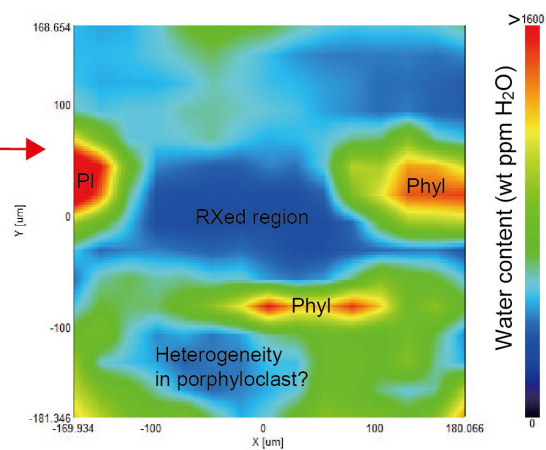

Phyl: Phyllosilicate (biotite and/or chlorite)  
Pl: Plagioclase

Strongly deformed sample  
Sample thickness: 125  $\mu\text{m}$

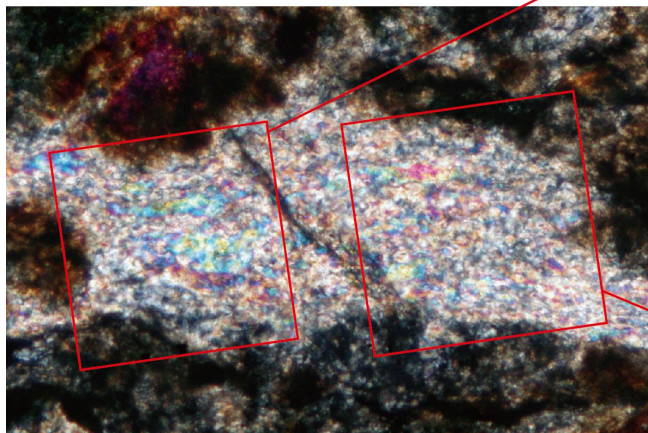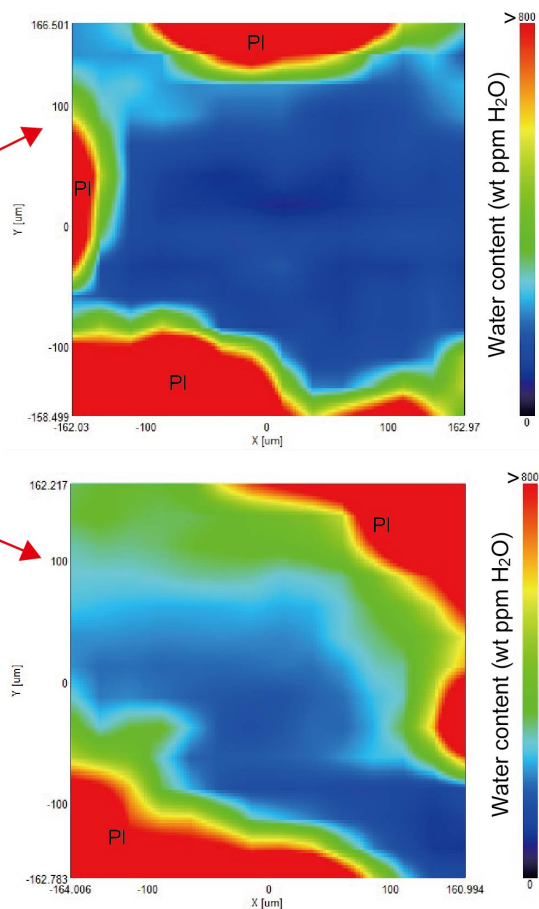

Regarding EBSD measurements, we do agree with the referee's comment: EBSD measurements could prove the recrystallization process including the formation of subgrains as well as slip systems of quartz in the three types of our samples (almost undeformed, weakly, and strongly deformed samples). In our old papers, too (e.g., Fukuda et al. 2012 Tectonophysics; Fukuda et al. 2018; JGR; Fukuda et al. 2022 JSG), when IR spectroscopic measurements of water in rocks and minerals give supportive and/or additional information on deformation behavior, we showed other data by other measurements including detailed microstructural observations, EBSD measurements, and/or deformation experiments.

On the other hand, when IR spectroscopic measurements are the main topic of papers, we think we should focus only on them as other papers do (e.g., Kronenberg and Wolf 1990; Kronenberg et al. 1990; Kronenberg 1994; Nakashima et al. 1995; Niimi et al. 1999; Muto et al. 2004, 2005; Finch et al. 2016; Kronenberg et al. 2017, 2020; Fukuda and Shimizu 2019). This is also because other data by other measurements can be independent and other topics. Therefore, we suppose that the other two referees, who would be familiar with plastic deformation quartz and IR measurements, did not point out EBSD measurements.



**Below are some additional comments.**

13-15. Bulges form on host grains, so I don't understand how they can also be a few hundred microns distant. Please clarify the language.

We suppose that the referee pointed out that bulging is a local process so it can not be “a few hundred microns distant”. We meant that bulged quartz grains in regions of a few hundred micrometers were a result of a repetitive bulging recrystallization as a local process consuming host grains. We have revised as follows.

L14,

bulging of quartz, which consumed adjacent host quartz grains, form regions of a few hundred micrometers.

We have also revised the similar expression in the Figure 3 caption.

L699,

Bulging of quartz, which consumed adjacent host quartz grains, form regions of a few hundred micrometers and host grains are elongated.

14-16. How can it be that small amounts of deformation involve bulging recrystallization, but large amounts of deformation are inferred to have experienced mainly subgrain rotation recrystallization? Is a switch in recrystallization mechanism over time being inferred, or did deformation occur at different conditions in different places (problematic for the study, since there is a tacit assumption that deformation conditions were similar in the three different samples). Alternatively, possibly there is not as much clarity about the deformation mechanisms as the author's think (EBSD analysis could help a little with this).

Rather than “a tacit assumption that deformation conditions were similar in the three different samples)”, the deformation conditions (pressure, temperature, stress, and/or strain rate) may be different. In the original manuscript, we classified the recrystallization mechanisms based on the conventional microstructural observations under a polarizing microscope (e.g., Stipp et al. 2002 JSG; Tullis 2002 Rev in Mineral and Geochem).

In the revised manuscript, we have added a new figure as Fig. 3 which shows general microstructures of the three different samples and discussed their deformation conditions.

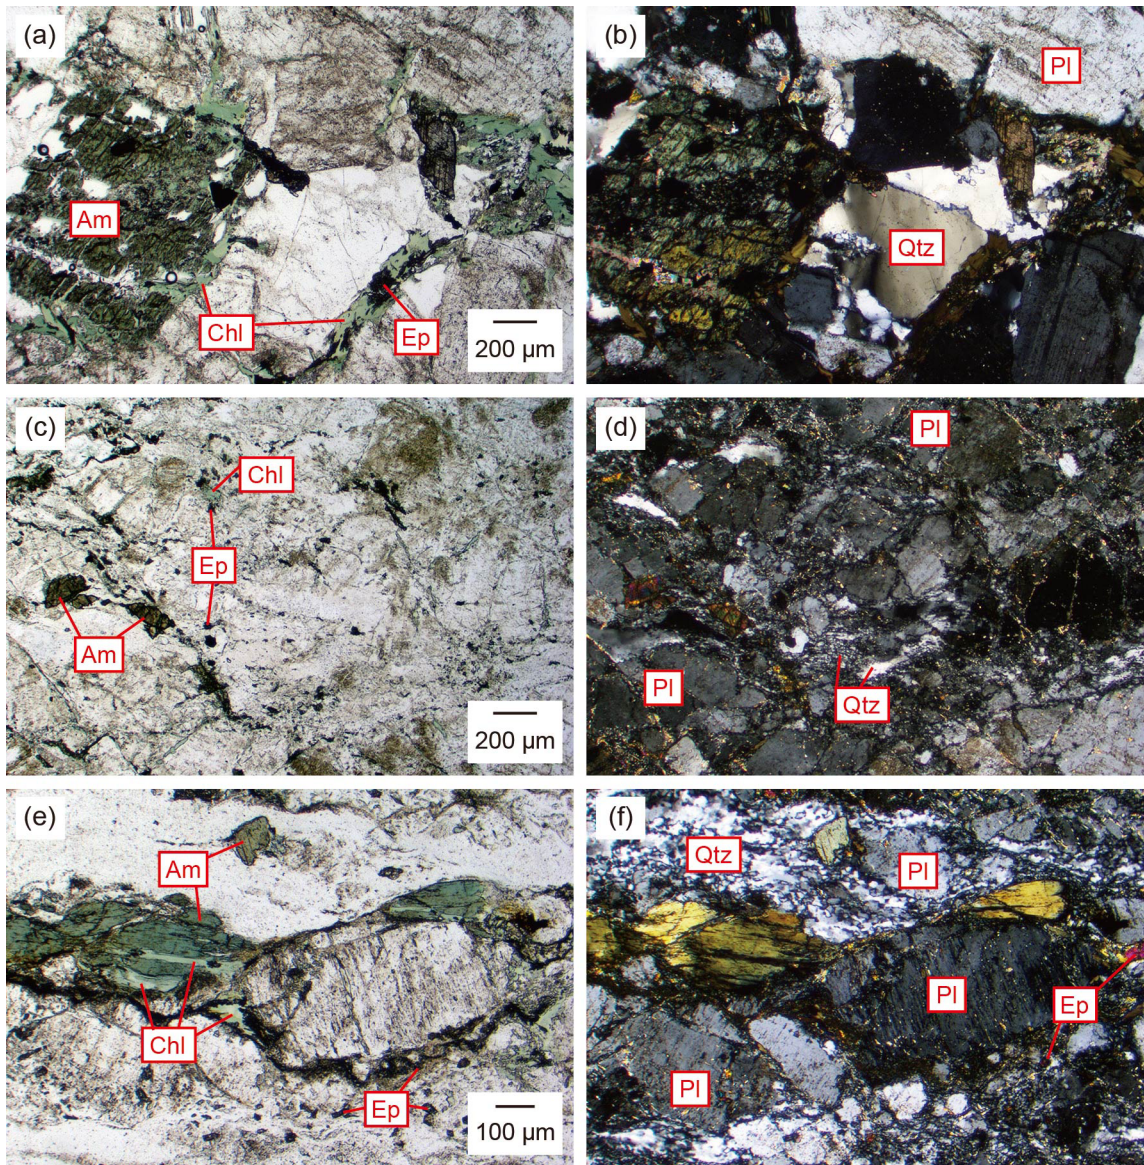

**Figure 3. Optical photomicrographs showing microstructures of the Wariyama granite under plane-polarized (a, c, and e) and cross-polarized (b, d, and f) light. (a and b) Almost undeformed sample. (c and d) Weakly deformed sample. (e and f) Strongly deformed sample. Microstructures of quartz in the three samples are shown in Fig. 4.**

L86,

In the almost undeformed and weakly deformed samples, mafic igneous minerals are partly replaced by epidote and chlorite (Fig. 3a–d). Although some or all chlorite may have replaced amphibole during late-stage hydrothermal alteration in the three types of sample (Fig. 3a, c, and e), chlorite is found in shear bands in the strongly deformed sample (Fig. 3e), suggesting that chlorite may have been stable during mylonitization. Grain interiors of plagioclase are commonly altered to epidote, muscovite,

and clay minerals in the three types of sample. In the weakly and strongly deformed samples (Fig. 3c–f), brittle deformation of plagioclase dominates and plagioclase and amphibole form porphyroclasts, but there is no development of microstructures indicative of dynamic recrystallization or pressure shadows at their margins. In the strongly deformed samples, amphibole (mainly hornblende) and epidote grains may have been stable during mylonitization because shear bands developed in the samples are composed of amphibole and epidote grains (Fig. 3e and f). According to Fujita et al. (1988), some metasedimentary rocks affected by the thermal effects of granitoid intrusions in the Wariyama area contain metamorphic andalusite, implying that these granitoids were emplaced into upper-crustal levels. On the basis of these observations, mylonitization at least of the strongly deformed sample is inferred to have occurred under epidote–amphibolite-facies conditions and within or near the andalusite stability field (i.e., ~500 °C; Spear, 1993).

L120,

Differences in the recrystallization mechanisms of quartz in the three types of sample may be due to differences in temperature, strain rate, and/or stress.

We have added Spear (1993) in the reference list.

20. Language issue: “is released” is problematic. “can be released” or “was released” would be better. There are scenarios where very dry quartz is recrystallized in the presence of water, and during this process water is added to the quartz. By saying “is” it sounds like the authors are making a universal claim.

We have changed “is released” to “was released” because this was what we found in our case and may not be “a universal claim” as the referee pointed out.

29 “several” better than “a few”

Revised.

Section 2 Samples: I would also like to see more attention paid to the deformation history of these samples. Are they from a strike slip, thrust, or normal sense deformation environment? Are they foot wall or hanging wall? Do we have information about the temperature of deformation? Is there information about the initial distance between these samples when deformation occurred (how similar do we really expect them to be)? Does previous work in the area suggest that the deformation of the three samples occurred simultaneously (at different strain rates), or was there a sequence of overprinting at progressively lower temperatures?

Regarding the deformation history and sense of deformation, we have clearly described them in the revised manuscript as follows.

L70,



Granite samples with differing degrees of deformation were obtained from the Wariyama uplift zone in NE Japan, which is located on the eastern side of the Futaba Fault (Fig. 1). The geological setting of this zone has been reported by Oide and Fujita (1975) and Fujita et al. (1988). The Wariyama uplift zone shows a N–S to NNE–SSW trend and includes many vertical faults (Fujita et al., 1988). Tsuchiya et al. (2014) reported a U–Pb zircon age of ca. 300 Ma for the Wariyama granite and documented an age of ca. 120 Ma for the Takase granite to the eastern side of the Wariyama granite. In the uplift zone, the deformed mylonitic Wariyama granite is found on the eastern side of the Takase pass as a local shear zone (Tsuchiya et al., 2013). The western and eastern edges of the Wariyama uplift zone are bounded by the NNW–SSE-trending Futaba Fault Zone, which is a sinistral strike-slip fault that formed during the mid-Cretaceous (Fujita et al., 1988; Otsuki, 1992). The foliations of the mylonitic rocks strike N–S to NNE–SSW with the dip to the east and the stretching lineations gently plunge to the north or south. Thus, the deformation of the Wariyama granite may be caused by the mid-Cretaceous movement of the Futaba Fault Zone.

We have added Otsuki (1992) in the reference list.

Regarding deformation conditions and their difference in the three different samples, we have added a new figure as Fig. 3 and discussed them. Please see our reply and revision regarding the referee's comment on L14–16.

96. “By imaging” is quite vague.

Indeed. We have revised as follows to summarize the sentences after that.

L122,

by image analysis of traced grains

101-102. These piezometers were calibrated using some samples that also experienced subgrain rotation recrystallization, not just bulging. Also, (line 106) the Cross piezometer uses a subset of the same samples Stipp used, so it's absurd to say that Cross et al is useful for samples that experienced subgrain rotation recrystallization, while Stipp piezometer is for bulging. In any case, it doesn't seem necessary to separate out two kinds of piezometers anyway because only rough estimates of stress are produced.

Even though “only rough estimates of stress are produced”, “a few tens of megapascals” and “few hundred megapascals” seem quite different. Stipp and Tullis (2003) and Holyoke and Kronenberg (2010) determined a grain-size piezometer for regime 1 (based on mechanical data by Hirth and Tullis 1991, where the deformed quartz microstructures show mainly bulging) and another piezometer for regimes 2 and 3 together (regime 2 of subgrain rotation and regime 3 of grain boundary migration). Therefore, so long as the piezometers of those authors are used, their piezometers for the different recrystallization mechanisms need to be separated.



Given the referee's comment, we realized that we should explain the application of each piezometer to different recrystallization mechanisms. We have revised the relevant text as follows.

L128,

The piezometers of Stipp and Tullis (2003) and Holyoke and Kronenberg (2010) developed mainly for bulging recrystallization were applied to the mean grain sizes of the almost undeformed and weakly deformed samples and they yield values of a few tens of megapascals. Similarly, values of a few hundred megapascals are obtained for the mean grain size of the strongly deformed sample using the piezometers of these two papers for subgrain rotation (and for grain boundary migration, but this type of recrystallization is not evident in our samples). Values of a few hundred megapascals are also obtained from all of the samples for a grain size of ~10  $\mu\text{m}$ , for which the reported piezometers do not distinguish the mechanisms of dynamic recrystallization (Twiss, 1977; Shimizu, 2008, 2012; Cross et al., 2017).

110-113. Inaccurate language: There is much more to preparing thin sections than by dissolving resin in acetone. We have described more in the revised manuscript as follows.

L139,

Sample thin sections with an approximate thickness of 100  $\mu\text{m}$  were prepared: The process for making thin sections followed that for regular thin sections with a thickness of ~30  $\mu\text{m}$  for observation using a polarizing microscope but there are a few exceptions: One side of the sample was polished down to #6000 aluminum oxide powder and glycol phthalate resin was used to attach the polished sample surface on a glass slide on a hot plate heated to 100–120 °C. Then, the other side of the sample section was polished down to #6000 to give an approximate thickness of 100  $\mu\text{m}$  to minimize scattered IR light on the sample surface and interference fringes within the sample. Finally, the sample was removed from the glass slide by dissolving the resin in acetone.

111-112. Similarly, this language about the dial gauge seems incomplete.

We have revised as follows.

L150,

Subsequently, the sample thin section was set on a stand stage equipped with a dial gauge and the actual sample thicknesses of the IR mapped areas were measured.

150-151. For those ignorant of such things (like myself): can we assume that the same IR calibration for quartz gives accurate values of water content in feldspars? A note and reference here or in the methods would be useful. The calibration of Paterson (1982) we used is designed for molecular  $\text{H}_2\text{O}$  but gives rough water contents in feldspar and phyllosilicate, which often measured together with quartz. We have clarified this as follows in the Methods section (3 Analytical procedure for IR spectroscopy).

L177,

This calibration is based on a linear trend of absorption coefficients for any type of water (H<sub>2</sub>O and OH) in different materials but assumes isotopically distributed molecular H<sub>2</sub>O for the orientation factor of 1/3, which is already included in the above equation. The mapped areas also include plagioclase and/or phyllosilicate, whose IR spectra exhibit a dominant band owing to molecular H<sub>2</sub>O and accessory band(s) caused by structural OH. It is noted, therefore, that the calibration of Paterson (1982) used for these minerals gives approximate water contents. Other calibrations for contents of molecular H<sub>2</sub>O and/or OH species in quartz have been given by Kats (1962), Aines et al. (1984), Nakashima et al. (1995), Libowitzky and Rossman (1997), Stipp et al. (2006), and Thomas et al. (2009). Fukuda and Shimizu (2019) compared these calibrations, and the ratios of calculated water contents between them based on Paterson (1982) as unity are 0.68:0.88:1.15:1.31:1.58:0.43. Previously reported absorption coefficients of water in quartz have been discussed by Fukuda and Shimizu (2019) and Stalder (2021). In this study, water contents are expressed as wt. ppm H<sub>2</sub>O, which is converted from mol H<sub>2</sub>O ℓ<sup>-1</sup> using the molar mass of H<sub>2</sub>O (18 g mol<sup>-1</sup>) and the density of quartz (2650 g ℓ<sup>-1</sup>). This conversion using these values was applied to other minerals, namely, plagioclase and/or phyllosilicate, which are commonly measured together with quartz in IR maps and used as markers for the locations measured. As the densities (averaged densities when mixed) of these minerals differ from that of quartz, albeit slightly, the water contents of the minerals reported in this study are approximate values.

155-156. This observation, that water content is less between recrystallized and unrecrystallized areas of the same sample is very important. It strengthens conclusions drawn from sample to sample differences in water content. The authors might want to emphasize this more elsewhere in the paper.

As the referee says, this finding is very important. According to the comment, we have added descriptions about “water content is less between recrystallized and unrecrystallized areas of the same sample” as follows.

L21 (Abstract),

These low water contents in recrystallized regions also contrast with those of up to 1540 wt. ppm in adjacent host grains in the weakly deformed sample.

L282 (5.2 Water in dynamically recrystallized quartz in the Discussion section)

These low water contents also contrast with those of up to 1540 wt. ppm in adjacent host grains in the weakly deformed sample.

L399 (Conclusions section),

Water contents in regions of recrystallized grains are 100–510 wt. ppm, with a mean of  $220 \pm 70$  wt. ppm, in the weakly and strongly deformed samples, whereas those of adjacent host grains observed in the weakly deformed sample are up to 1540 wt. ppm.

163-164. It is very difficult, perhaps impossible, to truly distinguish a small subgrain from a small grain in a thick section (when the grain size is much smaller than the thickness of the slide). I don't doubt that there are subgrains, but the language here is misleading.

As the referee says, regions of subgrains are just inferred as we described in the Figure 7 caption. We have revised as follows to describe the existence of subgrains just as a possibility.

L223,

regions of small grains around host grains widen at certain sample stage angles under a polarizing microscope and subgrains would be included (Fig. 8a–f). Water contents in recrystallized regions probably including subgrains are 290–500 wt. ppm (around Nos 1 and 2 in Fig. 8g and h),

169-170. Figure 8a is too zoomed out to see any subgrains (it seems from the placement of “(Fig. 8a)” that we are to see subgrains in the figure).

We have added two enlarged images (one under cross-polarized light and the other under plane-polarized light) that indicate the existence of subgrains. According also to the referee’s comment on L163-164, we have changed the sentence to say that subgrains are just inferred.

L231,

The IR mapped area consists mainly of recrystallized quartz (Fig. 9a). Crystallographic orientations of some grains within and around a relic of a host grain look continuously similar and/or continuously change, as in undulose extinction, and these grains would be subgrains (inset under cross-polarized light in Fig. 9a).

We have also revised the Figure 8 caption (Figure 9 in the revised manuscript) as follows.

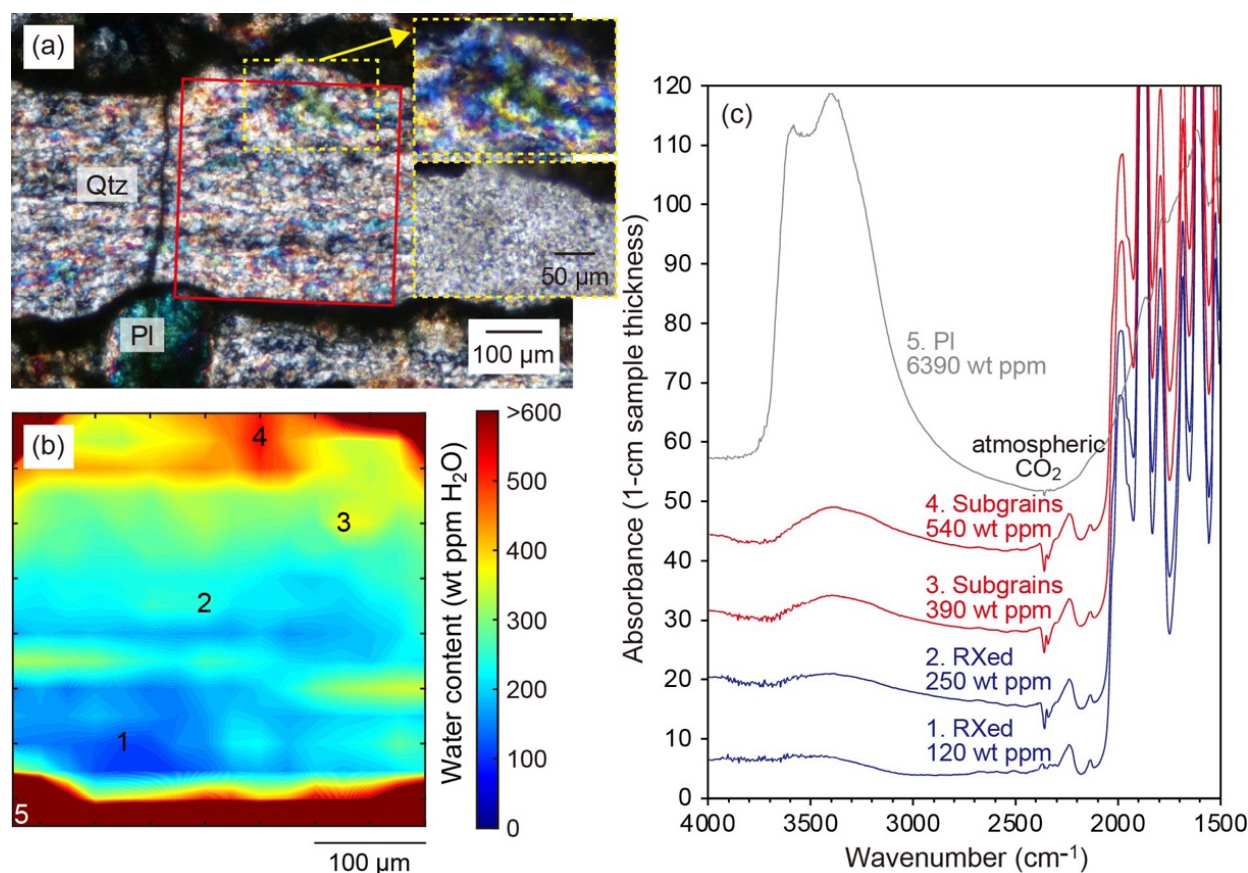

**Figure 9. IR mapping results...shown with a red square. The two insets in the yellow rectangles show enlarged images of a region that includes a relic of a host grain at the center under cross-polarized (upper) and plane-polarized (lower) light. (b) Water distribution. Numbers ... “recrystallized”.**

183-184. It is suggested later in the paragraph that small optically invisible inclusions can also provide a similar magnitude IR signal. So why presume that it is the large inclusions that are responsible here? Couldn't it be the case here that the signal is also mainly from submicroscopic inclusions? You could substantiate your claim by measuring the density of inclusions as compared to the IR results in the sample (is there a correlation?), or cite some earlier work if this has been addressed before.

As the referee pointed out, “submicroscopic inclusions” may be included in the almost undeformed sample and they may be measured by IR spectroscopy. In the revised manuscript, we have revised the following sentence; “a broad band at 2800–3750  $\text{cm}^{-1}$  as molecular  $\text{H}_2\text{O}$ , which is presumed to correspond to fluid inclusions in quartz grains observed in the optical photomicrograph (Fig. 3b).” We have focused only on the observations in the optical photomicrographs here.

L246,



The IR spectra commonly show a broad band at 2800–3750 cm<sup>-1</sup> as molecular H<sub>2</sub>O in the three different samples. In the almost undeformed sample, fluid inclusions in quartz grains are visible and heterogeneously distributed in the optical photomicrograph (Fig. 4b), but submicroscopic fluid inclusions may be included. In the weakly deformed sample, fluid inclusions in host quartz grains are less numerous in the photomicrograph (Fig. 4d).

185. Change “do not differ” to “do not differ substantially” (means of 500 vs 800 are different)

Revised.

L254,

do not differ substantially

185-187. This is a big claim (that it must be because of invisible inclusions... how would that happen? show us micrograph images of the two areas?). Can the same technique be used to verify the presence of small inclusions that Stunitz used?

The speculation about a redistribution of water by Stunitz et al. (2017) is also based on their observations by polarizing microscope and IR measurements, which are also introduced in our manuscript (L264-L277 in the revised manuscript). This is the same in our study. We suppose that the referee pointed out that invisible or visible inclusions can be included both in the undeformed and weakly samples. On the other hand, the water distributions in the almost undeformed sample are always heterogeneous (Fig. 5; Fig. 6 in the revised manuscript) and they never match with the shapes of quartz grains unlike those in the weakly deformed sample (Figs 7 and 8 in the revised manuscript). Please also see our reply to the referee's comment on L190-193: The referee says in his/her comment on L190-193 that “I imagine that the signal strength might depend on the size of inclusions (microscopic vs sub-microscopic).”. If the signal strength depended on the size of inclusions (it does not actually), the signal from invisible inclusions became weaker than that from visible inclusions. Therefore, this part may not make sense for the referee and the referee may have given his/her comment on L185-187.

Regarding “how would that happen?”, it is discussed in the papers we cited (Kerrick, 1976; Wilkins and Barkas, 1978; Hollister, 1990; Cordier et al., 1994; Vityk et al., 2000; Faleiros et al., 2010), which are based on observations by polarizing microscope. In the revised manuscript, we have explained the processes proposed by these papers.

L259,

Faleiros et al., 2010): The redistribution of fluid inclusions is possible by volume diffusion and/or diffusion through dislocation cores (pipe diffusion) of water molecules and/or hydrogen.

190-193. I don't know much about IR detection of water, but I imagine that the signal strength might depend on the size of inclusions (microscopic vs sub-microscopic). If so, it would affect this supposition. Add some information on this if possible.

Regarding “I imagine that the signal strength might depend on the size of inclusions (microscopic vs sub-microscopic).”, no, it does NOT depend on the size of inclusions but just on the amounts of water measured by the aperture. The calculation of water contents is based on Beer-Lambert law as  $A = \epsilon Cd$ , where  $A$  is the absorbance,  $\epsilon$  is the absorption coefficient,  $C$  is the concentration,  $d$  is the sample thickness. Thus, “microscopic vs sub-microscopic” does not matter for “the signal strength”, which is converted to the water content. This is basic knowledge about IR spectroscopy (and any types of spectroscopic measurements) so we do not think we need “some information on this”.

This comment of the referee and our reply about may be applicable to the referee’s comment on L185-187 (and possibly on L183-184 as well). See our reply there.

193-194. Confusing language. Change “are comparable” to “correspond to”

We have revised this expression throughout the manuscript.

L251, L370, L396, L749,

correspond to

195-197. I’m not following the logic here. Why “therefore”? This idea of redistribution seems odd to me. It seems like, overall, water left the system during deformation, so it seems unlikely it would increase in the host crystals—is that what is being implied (“higher water contents...due to the redistribution of fluid inclusions”)?

We have deleted the sentence identified by the referee. What we meant was that water in host quartz grains, which are also plastically deformed, is retained and redistributed within host grains, whereas water is released during dynamic recrystallization. We did not mean “it would increase in the host crystals”; as the referee states, “it seems unlikely”.

We realized that the original sentence was unclear. Also, according to the referee’s comment regarding L183-184, we have reorganized this paragraph in the revised manuscript as follows: 1. Optical micrographs; 2. IR mapping results; 3. Water redistribution based on 1 and 2; and 4. A comparison of our results with previous work on water redistribution.

L247,

In the almost undeformed sample, fluid inclusions in quartz grains are visible and heterogeneously distributed in the optical photomicrograph (Fig. 4b), but submicroscopic fluid inclusions may be included. In the weakly deformed sample, fluid inclusions in host quartz grains are less numerous in the photomicrograph (Fig. 4d). In the IR mapping images for the weakly deformed sample, the high-water-content regions (Figs 7b and 8g) correspond to relics of host grains identified under a polarizing microscope (Figs 7a and 8a–f). In comparison, in the almost undeformed sample, water contents in host grains are simply heterogeneous. As water contents in host quartz grains in the almost undeformed and weakly deformed samples do not differ substantially, although their distributions in the two samples are different, a redistribution of fluid inclusions with a size

change to less than the optical microscopic scale must have occurred in the latter sample. The redistribution of fluid inclusions owing to plastic deformation has been reported in previous **microstructural** observations (Kerrick, 1976; Wilkins and Barkas, 1978; Hollister, 1990; Cordier et al., 1994; Vityk et al., 2000; Faleiros et al., 2010): **The redistribution of fluid inclusions is possible by volume diffusion and/or diffusion through dislocation cores (pipe diffusion) of water molecules and/or hydrogen.** Some of those studies proposed leakage of water during the redistribution of fluid inclusions, but this is unlikely to have been significant in the host grains analyzed in the present study since the water contents in host grains in the almost undeformed and weakly deformed samples are not significantly different. The redistribution of fluid inclusions has similarly also been reported from IR spectroscopic measurements of an experimentally deformed single quartz crystal (Stünitz et al., 2017).

210. Section 5.2. It is unclear to me what the main point(s) of this section is. I read it a few times and it feels like a loose collection of thoughts and information from the literature about water in recrystallized quartz. I'm not sure if any new idea is being presented, or what exactly the new data contribute to the previous understanding.

There is limited information on diversity of water contents in regions of recrystallized quartz whose grain sizes are also different. As described in this section, if one compares our water contents and grain boundary widths with those in previous studies, they would know that their values are different. We hope the referee also reads the comment from Referee #3 (Prof. Kronenberg) and understands the importance of this section as well as this study based on IR spectroscopy. Please also see our reply to the referee's comment on Discussion below.

219. "development of dynamic recrystallization" wording is linguistically problematic. Replace with "development of dynamically recrystallized grains" or "dynamic recrystallization".

We have changed to "dynamic recrystallization".

L289,

released by dynamic recrystallization

229. "which may be due to the transition from subgrains to recrystallized grains" This could be tested with EBSD.

We agree but EBSD measurements are beyond of this study. Please also see our reply to the referee's general comment in p. 2-4 of this file.

244. This is a hypothetical statement. Use "were" instead of "is"

We disagree. It does not need to be a subjunctive mood as if it is never realistically possible.

244-245. Just a thought (no need to address it): If the water can be "distributed homogeneously in grain boundaries as thin films," is there any concern that it can be added or lost during the process of making thick sections? What

happens if the samples are heated before IR analysis (this might remove grain boundary water)? Could test for this with IR analysis before and after a heating.

In Fukuda et al. (2009), a paper by the first author, we examined whether water “can be added or lost during the process of making thick sections” and “What happens if the samples are heated before IR analysis (this might remove grain boundary water)”. In Fukuda et al. (2009), we used chalcedony, a microcrystalline quartz that consists of grains ranging in size from ~100 nm to 1 µm. The grain size is so small that much more water is stored in grain boundaries compared with grain interiors. We confirmed that water in grain boundaries and pores at the TEM scale is held there during thin sectioning and that tightly trapped water of this type gradually dehydrates when the sample is heated to a temperature of >350 °C (e.g., 20% of water dehydrates during 8 h of heating at 350 °C). Thus, with regard to the referee’s questions here, we have already checked that arguments in this manuscript relate to originally trapped water in the samples. We have added the following sentences in Section 3. “Analytical procedure for IR spectroscopy”.

L154,

Water in tight grain boundaries and triple junctions (e.g., at the scale of transmission electron microscope resolution), as well as water in grain interiors, is preserved during the above-described processes of thin sectioning and heating on a hot plate (Fukuda et al., 2009). Therefore, arguments and interpretations in this paper concern water that was originally trapped in the samples.

We have added Fukuda et al. (2009) in the reference list.

252-254. This sentence is confusing me. Why is thought to be “continuously supplied”? What is the significance of “textural modifications” here?

This sentence makes a contrast with samples that underwent “textural modifications” (“microstructural modifications” in the revised manuscript) but did not undergo “continuous supply”. → (1) This is described in the previous paragraph. The sentence pointed out by the referee here and a few sentences before concern samples that underwent both “textural modifications” and “continuous supply”. → (2). We have also described the case of (1) again to clarify, as follows.

L334,

Thus, IR spectra of these samples measured in laboratories may show large water absorption bands stored in grain boundaries with decreasing grain size compared with samples that did not undergo subsequent water infiltration along grain boundaries in previous studies (Finch et al., 2016; Kilian et al., 2016; Kronenberg et al., 2020).

254. “Intracrystalline parts” language is unclear. “Crystal interiors” makes more sense to me (if that is what is meant).



Both “crystal interiors” and “intracrystalline parts” may be linked to the atomic scale of the quartz crystal structure including defect OH; in this case, fluid inclusions may not be included. Therefore, we have changed “Intracrystalline parts” to “grain interiors” throughout the manuscript as Referees #2 and #3 also use this expression in their reviews.

L56, L285, L334, L344, L741, L744,

grain interiors

278. Change “original fluid inclusions can be redistributed” to “water from original fluid inclusions can be redistributed”

Revised.

L361,

water from original fluid inclusions can be redistributed

286-288. I’m not following this logic. Why is diffusion invoked to explain host vs rxld grain water in these samples? All you need is to remove water in recrystallized grains, and the remaining host quartz just holds onto its water (no diffusion necessary except perhaps to redistribute from large to small inclusions).

This sentence discusses diffusion within host grains; it is not about “host vs rxld grain water”. To clarify, we have added “within host grains” as follows.

L369,

Thus, the redistribution of fluid inclusions caused by diffusion within host grains may account for water distributions that correspond to the shapes of host grains in the weakly deformed sample (Figs 7 and 8), as discussed in section 5.1.

290-291. The words “that lead to the development of equilibrium texture” may not be necessary, and ideas of “equilibrium” are often complicated (are they really equilibrium? How would we know?). Also it would be necessary to explain what is meant by “equilibrium texture;” do you mean “equilibrium microstructure” (texture for some people means CPO, but I don’t think it’s what is meant)? Probably best to just trim the sentence by removing these words.

This referee’s comment is also associated with his/her comment on L297-299. We realized that we should clearly explain “that lead to the development of equilibrium texture” rather than just trimming the sentence by removing these words”.

We meant “the equilibrium state of water in the system”, which is the same in the previous studies we cited for microstructural observations of movements of fluid inclusions by dynamic recrystallization of quartz to form the equilibrium state of water in the system (Kerrick, 1976; Wilkins and Barkas, 1978; Hollister, 1990; Cordier et al., 1994; Vityk et al., 2000; Faleiros et al., 2010). Based on the referee’s comments here and on L297-299, we have changed “equilibrium texture” here to “equilibrium state of water in the system” and added explanation about it.

L374,

the equilibrium state of water in the system. In other words, original fluid inclusions in host quartz grains in the photomicrograph (Fig. 4b) and IR spectra (Fig. 6) were trapped during quartz crystallization from magma, and their contents were not equilibrated with the water system under deformation conditions (possibly including water activity and/or water fugacity).

294.-295. I think it is being suggested that formation of subgrains releases an intermediate amount of water. Can this really be inferred with the available data? Consider also the possibility that measuring a mixture of recrystallized grains and undeformed grains also gives an intermediate value. It is very difficult (or impossible) to tell, optically, in a thick (100  $\mu\text{m}$ ) sample what is a subgrain and what is a recrystallized grain... EBSD could help clarify what is happening, I believe.

In the original manuscript, we described as follows before the sentence pointed out by the referee here. L219 in the revised manuscript; “In addition, a gradual decrease in water content from the host grains to the adjacent recrystallized regions is observed in some cases; for example, over a distance of  $\sim 150\ \mu\text{m}$  from No. 3 (host; 680 wt. ppm in Fig. 7c) to No. 1 (recrystallized region; 210 wt. ppm). In terms of **microstructure**, this decrease is consistent with the development of dynamic recrystallization from subgrains in and around host grains (Fig. 7a) to recrystallized grains.”. And L296; “In addition, in our weakly deformed sample, water contents in quartz gradually decrease with increasing distance from the adjacent host grains within a range of  $\sim 150\ \mu\text{m}$  (Fig. 7), which may be due to the transition from subgrains to recrystallized grains. In addition, in the strongly deformed sample, water contents in regions of subgrains are higher than those in recrystallized regions (Fig. 9).” Thus, regions of subgrains are also inferred even in thick samples and they show higher water contents than those in fully recrystallized regions. Based on the above observations and IR measurements, it seems unrealistic to think about “a mixture of recrystallized grains and undeformed grains” in the IR mapped areas.

297-299. What is the “equilibrium state” of water during deformation? This concept would need to be explored before ending the paper with this sentence. Is it related to temperature, presence of other minerals? Equilibrium between water in quartz and what? Has this been quantified in the literature, and if so what is the significance of the value found (can it be used to quantify anything, water fugacity maybe?)?

As we replied to the referee’s comment on L290-291, we have explained “equilibrium state” in L374 in the revised manuscript. Here, we have changed “equilibrium state” to “equilibrium state of water in the system”.

L385,

the equilibrium state of water in the system corresponding to the deformation conditions.

629. “addition” not “addiction”

Indeed. Revised.

L748,

In addition,

629-633. suggestion: I find the language “former and latter” confusing. Try more direct language, i.e. just say “in the weakly deformed sample” rather than “in the former sample.”

Revised.

L748,

the water distributions in host grains in the weakly deformed sample correspond to the shapes of host grains (Figs 7 and 8), but those in the almost undeformed sample do not (Fig. 6).

630. It says water distributions in host grains in the undeformed sample...are “not comparable” with the shapes of host grains (Figs 5–7). This is a strange statement because the size of grains in the undeformed sample is much bigger than the IR maps, so how is this known?

We believe that the expression, “comparable” was confusing. This part was not a comparison between “water distributions” and “the size of grains” but was a comparison between “water distributions” and “the shapes of host grains”. According also to the referee’s comment on L193-194, we have changed “comparable with” to “correspond to” throughout the manuscript.

Discussion. What is the bigger significance of these findings? It was already known that water can be released during deformation.

We discuss and focus on the following topics. 1. Diversity in water contents with respect to regions of recrystallized quartz and recrystallized grain size. We also state that these water contents and grain sizes are different between our study and previous studies. 2. The release of water during deformation. We emphasize that such release is NOT always common and that a water-infiltration process may have occurred in some samples. 3. The release process of water from subgrains to fully recrystallized grains. Water content in regions of subgrains have not been discussed in previous studies. Please also see our reply to the referee’s comment regarding L210.

The referee is familiar with the plastic deformation of quartz and its microstructures. The referee’s question here is similar to why scientists continue to observe and measure quartz fabrics, even though we already know about different dynamic recrystallization mechanisms, slip systems, and opening angles of the c-axis, among others. Simply speaking, one of the important questions is that we want to know how diverse these aspects are by studying samples that have undergone different crustal conditions. We emphasize that information about water in quartz is in fact very limited, much more so than that about quartz fabrics, for example.

Figure 1. Label A and B. Need inset showing location in Japan. The lower map should be clear about what the black lines are...are they faults, intrusive contacts, depositional contacts, roads (they seem to be a mix of these

things)? Also the blobs with various deformed status are confusing—is this really the only part of the Wariyama granite that is deformed? Is the deformation related to any of the faults/contacts shown?

In the revised manuscript, we have labeled (a) and (b) and added an “inset showing location in Japan”. We have explained “what the black lines are”. We have changed one black solid line to a dashed line, which is a forest path including the Takase pass. Other original black lines show geological boundaries. We have explained them in the revised manuscript. The revised figure and caption are shown below.

Regarding “Also the blobs with various deformed status are confusing—is this really the only part of the Wariyama granite that is deformed? Is the deformation related to any of the faults/contacts shown?”, they are where the three types of the deformed Wariyama granite are distributed based on our field survey. In the revised manuscript, we have explained the relationship between the samples we studied and Futaba Fault Zone. Please see our reply and revision in p. 7-8 of this file regarding the referee’s comment on Section 2 Samples.



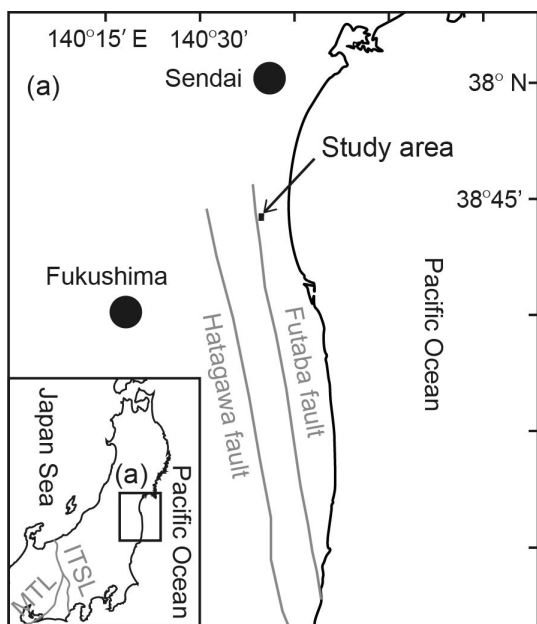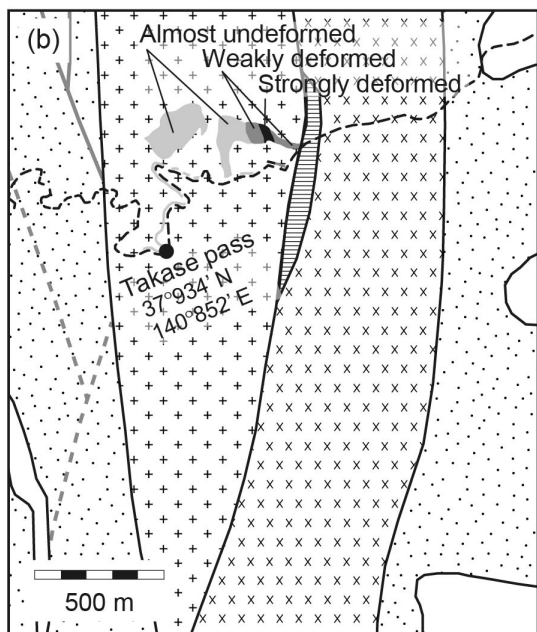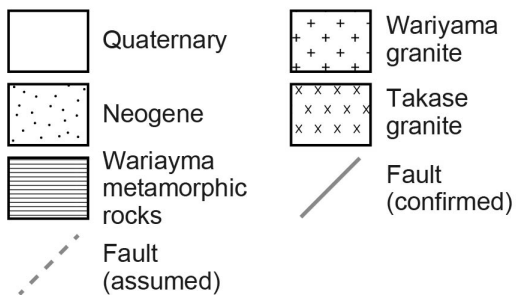

The caption for revised Fig. 1 is shown below.

**Figure 1. Study area location map (a) and geological map (b) of northeastern Japan** after Oide and Fujita (1975), Fujita et al. (1988), and Tsuchiya et al. (2014). **The inset in (a) shows the location of the study area and major tectonic lines [the Itoigawa–Shizuoka Tectonic Line (ISTL) and the Median Tectonic Line (MTL)]. In (b), the dashed black line represents a path including Takase pass. Solid black lines represent geological boundaries.** The Wariyama granite was categorized into three types based on the degree of deformation, **as observed in hand specimen** (Fig. 2) and by microstructures observed under a polarizing microscope (Figs 3 and 4). The three types are referred to as “almost undeformed”, “weakly deformed”, and “strongly deformed”, with distributions as shown in the geological map.

Figure 5, 6, 7, 8. Color scale for the IR maps should be the same so that they can be directly compared visually. For example in line 185-187, it says that regions of two samples have the same water content, but we can't visually “see” this easily the way the figures are currently colored. This would also help compare figures 6 and 7, which are of the same sample. The change will also help the reader intuitively grasp the main result of the paper (the strongly deformed sample will show up as mostly blue, whereas the undeformed sample will be red).

We originally considered presenting all of the IR maps with the same color scale, as suggested by the referee. The same color scales were also used, for example, by Kronenberg et al. (2017). As the referee states “(the strongly deformed sample will show up as mostly blue, whereas the undeformed sample will be red)”, which is true. However, in our study, this color-coding option makes detailed water distributions obscure, especially for Figs 6 and 8 (Figs 7 and 9 in the revised manuscript). Please see the figures presented below, which show original figures and alternative figures in the same color scales.

In the alternative figures of the IR maps, we used the same color scales based on Fig. 5c (Fig. 6c in the revised manuscript), in which the red color for the maximum water content represents 1800 wt. ppm (other alternative Figs 6-8c show the red color as >1800 wt. ppm because of the much higher water contents in plagioclase).

In alternative Fig. 6c, the difference between the measured point No. 1 and 2 cannot be visually distinguished, nor can the water distribution around No. 3 (regions of subgrains). Therefore, the following explanation in the original manuscript would have been unclear. L218 in the revised manuscript; “In addition, a gradual decrease in water content from the host grains to the adjacent recrystallized regions is observed in some cases; for example, over a distance of ~150  $\mu\text{m}$  from No. 3 (host; 680 wt. ppm in Fig. 7c) to No. 1 (recrystallized region; 210 wt. ppm).”

Alternative Fig. 7c can be directly compared with Fig. 6c, so the alternative color coding may be better for this figure. In alternative Fig. 8c, water contents around the measured points Nos 3 and 4 (regions of subgrains) are not clear, which is problematic.

In addition, if the same color scales were applied to all of the IR maps, we would be concerned that readers may try to equate reddish parts with high water contents in quartz, which does not exist in most of the IR maps.

Thus, because of the above reasons regarding the same color scale (that is, the lack of clarity about water distributions that we discuss and possible confusion for readers), we adopted different color scales for each IR map.

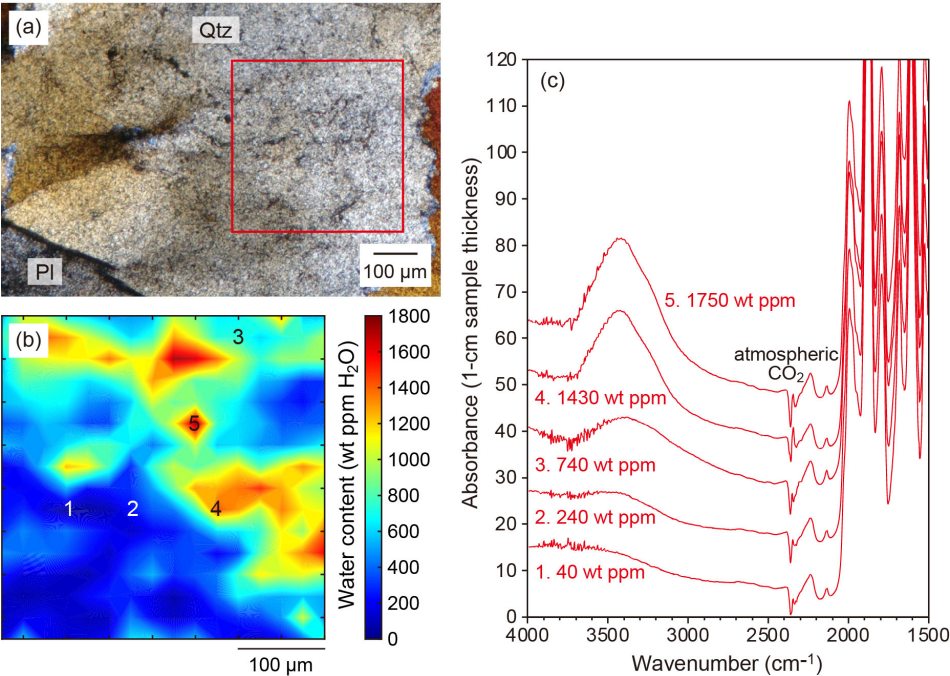

Figure 5 (Figure 6 in the revised

manuscript).

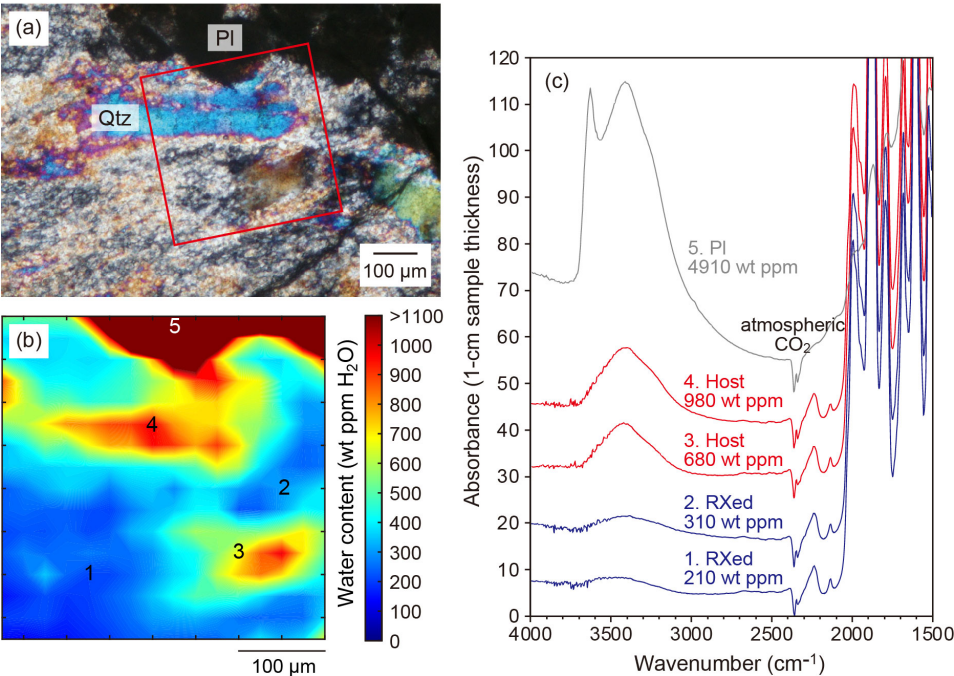

Figure 6 (Figure 7 in the revised

manuscript).

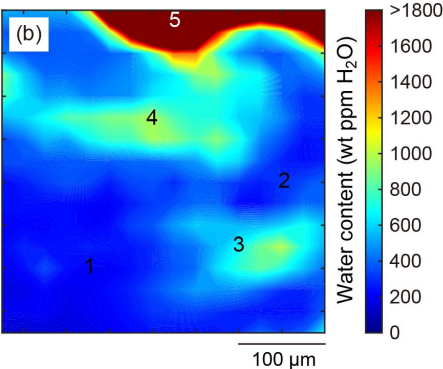

Alternative Figure 6c.

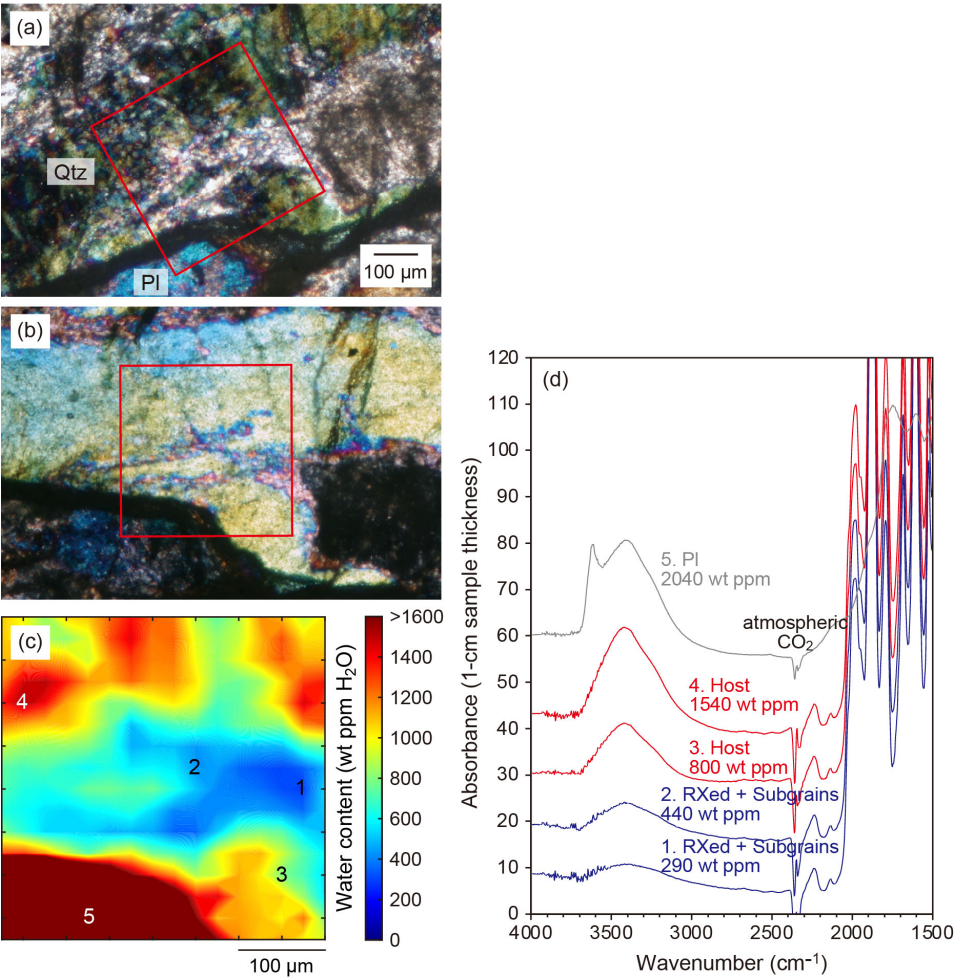

Figure 7 (Figure 8 in the revised

manuscript).

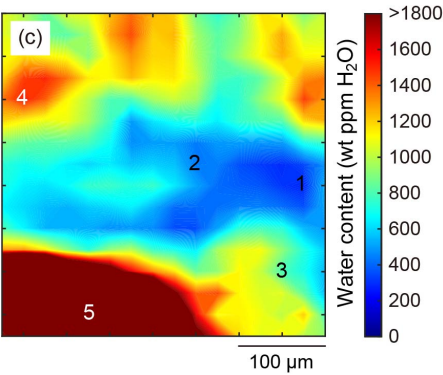

Alternative Figure 7c.



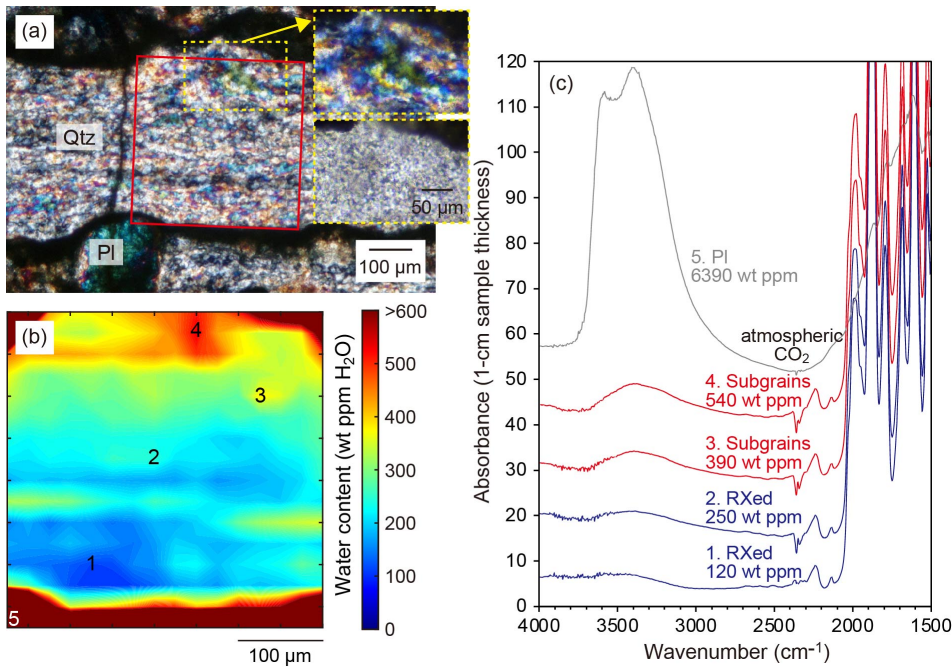

Figure 8 (Figure 9 in the revised

manuscript).

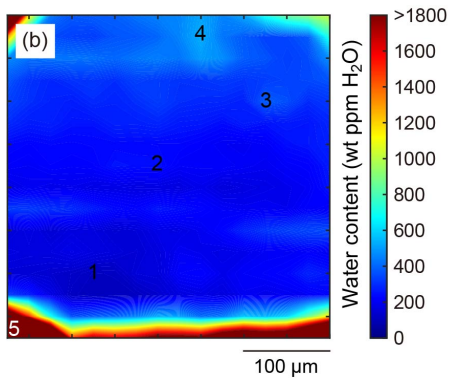

Alternative Figure 8c.

### Some questions I am left with:

How significant would the change in water content be in terms of rheology of the samples?

The undeformed quartz is heterogeneous in terms of water content. Water weakens quartz. So one might expect that deformation would occur mainly in areas of high water content. However, the host quartz remaining in weakly deformed quartz has more water, on average, than the undeformed quartz—not what you'd expect if recrystallization were focused in the high-water areas. How do you explain this? Perhaps it is a result of the small data set (i.e. one of the samples is anomalous in terms of water content)

It is difficult not only from this study but also from other similar studies to discuss the relationship between water contents and rheology. As we discussed in Section 5.2, we compared our results with those in Finch et al. (2016), Kilian et al. (2016), and Kronenberg et al. (2020) for naturally deformed quartz and Palazzin et al. (2018) for experimentally deformed quartz. Finch et al. (2016) has given a possibility of transition from dislocation creep to diffusion creep due to released water but other studies did not see an effect(s) of released water. The referee says this may be because of “a result of the small data set”, which would not be applicable only to our study but also to all similar studies. As we replied to the referee’s comments on L210 and Discussion, there is still only limited information on water contents, species, and distributions with the development of texture in deformed quartz.
